# Supplementary material
Source: Springer Nature journal article supplement (https://www.springermedizin.de/resource/supplementary/12889_2010_2198_MOESM2_ESM.pdf/9484934)

**Baseline assessment  
(1,700 Aboriginal children, 700 families)**

**General health assessment**

Questionnaires for child and parent (all)  
Physical measures (including, height, weight, waist circumference, blood pressure) (all)

**Ear health and hearing**

Audiology Clinic: Hearing and middle ear examination by audiologists (including, age appropriate testing, otoscopy/pneumatic otoscopy, tympanometry, audiometry) (6 months – 17 years)

**Speech, language and development**

Speech Pathology Clinic: Speech and language testing by speech pathologists (including age appropriate testing)  
Parental Evaluation of Developmental Status (1 to 7 years)

**Data linkage**

Linkage to population health databases (including, general practitioner services, medications and hospital inpatient episodes)

**Strengths and Difficulties Questionnaire validation study**

Focus groups, survey data and clinical interviews used to determine whether the Strengths and Difficulties Questionnaire is a culturally appropriate and useful screening tool for Aboriginal children living in urban communities in NSW.

**Randomised controlled trial of health-broker intervention (subgroup with otitis media)**

Prevalent or incident otitis media diagnosed and GP care plan initiated

Family unit randomised. Half provided early intervention (first 3-months) and half provided late intervention (usual care plus intervention in second 3-months). Intervention is provided by Aboriginal health-broker

Management of otitis media is reviewed over first 3-month period by an outcomes assessor blinded to intervention group

**Resilience study**

Focus groups and in-depth interviews in selected ACCHOs

**Housing feasibility study (50-80 families from baseline)**

An audit of the housing situation of 50-80 families participating in the SEARCH cohort study, with a particular emphasis on factors proven to influence child health:

- Temperature
- Child safety
- Mould

**Cohort study:  
2 year follow-up**

Follow-up assessments of all participants at 2 years, including questionnaires and physical measures

**Cohort study:  
longitudinal follow-up**

Ongoing longitudinal data linkage plus follow-up of cohort at least every 5 years over several decades (including, questionnaires and physical measures)

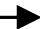

Supplement: MOESM2 [file 9484934]
